# Supplementary material for: Lyso-Gb3 Increases αvβ3 Integrin Gene Expression in Cultured Human Podocytes in Fabry Nephropathy
Source: MDPI journal article supplement (doi:10.3390/jcm9113659), 2020-11-13
Supplement: s1 [file s1]

*Supplementary files*

## **Lyso-Gb3 Increases $\alpha v\beta 3$ Integrin Gene Expression in Cultured Human Podocytes in Fabry Nephropathy**

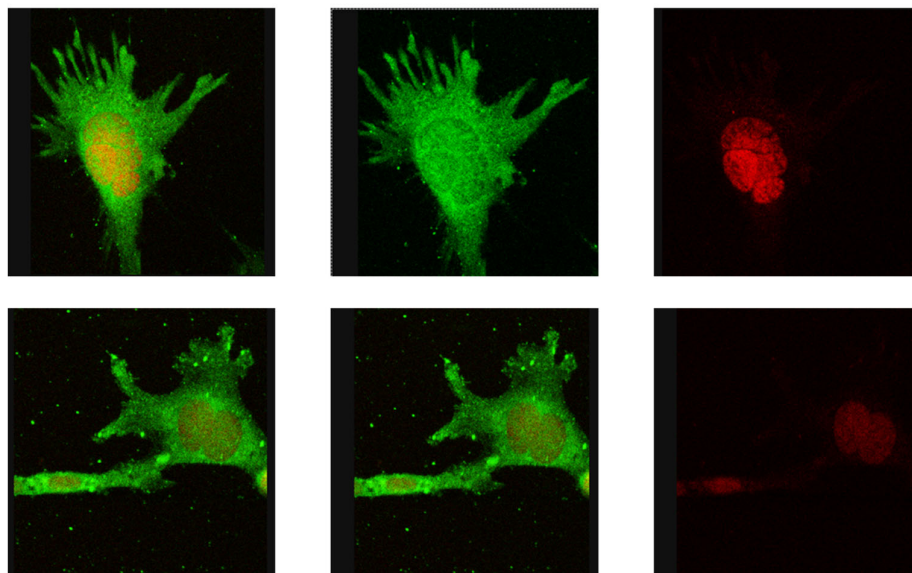

**Figure S1.** Densin. Morphology of cultured human podocytes and expression of the slit diaphragm protein densin using a previously described antibody (Ahola H, Heikkilä, Aström E, et al. A novel protein, densin, expressed by glomerular podocytes. *J Am Soc Nephrol.* 2003; 14(7):1731–1737.

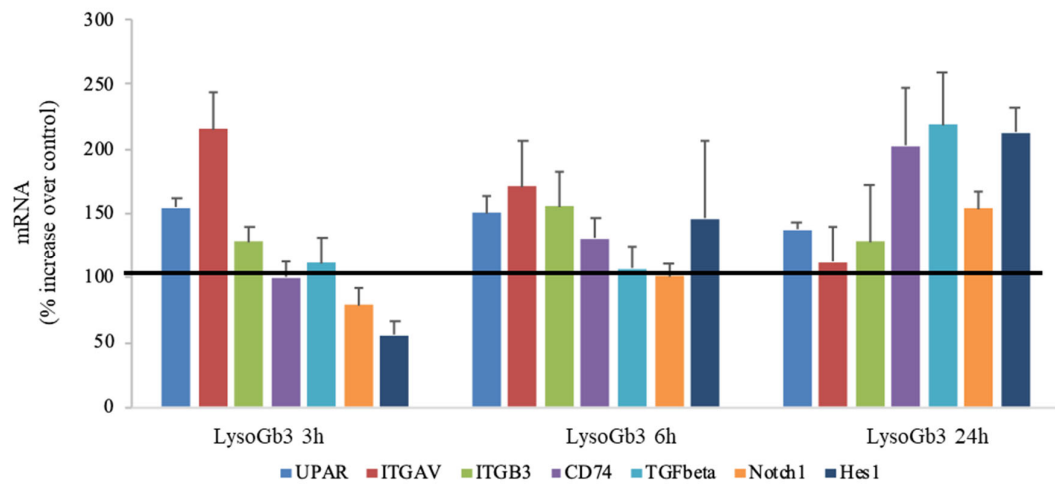

**Figure S2.** Time course of gene expression in podocytes in response to lyso-Gb3. The Figure present data shown in Figure 3, with SEM bars added.
